# Supplementary material
Source: ML conference proceedings conference paper supplement (https://openaccess.thecvf.com/content/WACV2024/html/Laroche_Fast_Diffusion_EM_WACV_2024_paper.html)
Supplement: Supplementary file 1 [file Laroche_Fast_Diffusion_EM_WACV_2024_supplemental.pdf]

# Appendix

Charles Laroche  
GoPro & MAP5

charles.laroche@u-paris.fr

Andrés Almansa  
CNRS & Université Paris Cité

andres.almansa@parisdescartes.fr

Eva Coupete  
GoPro

ecoupete@gopro.com

## Abstract

*This document provides additional details for the article **Fast Diffusion EM: a diffusion model for blind inverse problems with application to deconvolution**.*

## A. Iterative Diffusion EM algorithm

Algorithm A.1 summarizes the Diffusion EM algorithm described in sections 3.1 and 3.2.

---

### Algorithm A.1 Diffusion EM algorithm

---

**Require:**  $y, \sigma, H_0, L$ ,

**Ensure:**  $H \approx \arg \min_H p(y|H)$  and  $x_0^i \sim p(x_0|y, H)$

**for**  $l = 1$  **to**  $L$  **do**

$\mathbf{x} = E\text{-step}(y, H_{l-1}, \sigma)$

$H_l = M\text{-step}(y, \mathbf{x}, \sigma)$

**end for**

**return**  $\mathbf{x}, H_L$

---

▷  $n$  samples from Alg. 1  
▷ Iterate (24) and (25)

## B. M-step computations

In this section, we derive the computation of the M-step. In particular, we solve Equation (22) from the main paper:

$$Z^* = \arg \min_{Z \in \mathcal{C}} \frac{1}{2\sigma^2 n} \sum_{i=1}^n \|Zx^i - y\|_2^2 + \frac{\beta}{2} \|Z - H\|_2^2. \quad (\text{B.1})$$

with  $\mathcal{C}$  the space of convolution operators.

In order to account for the fact that  $H \in \mathcal{C}$  and  $Z_t \in \mathcal{C}$  are convolution operators, we rewrite the same equation in the Fourier domain, where the operators  $H$  and  $Z$  become diagonal:

$$\mathcal{F}(H) = \text{diag}(h(1), \dots, h(d)), \quad (\text{B.2})$$

$$\mathcal{F}(Z) = \text{diag}(z(1), \dots, z(d)). \quad (\text{B.3})$$

Re-writing the minimization in the Fourier domain leads to:

$$\mathcal{F}(Z^*) = \arg \min_{Z \in \mathcal{C}} \frac{1}{2\sigma^2 n} \sum_{i=1}^n \|\mathcal{F}(Z)\mathcal{F}(x^i) - \mathcal{F}(y)\|_2^2 + \frac{\beta}{2} \|\mathcal{F}(Z) - \mathcal{F}(H)\|_2^2 \quad (\text{B.4})$$

$$= \arg \min_z \frac{1}{2\sigma^2 n} \sum_{i=1}^n \sum_{j=1}^d |z(j)\mathcal{F}(x^i)(j) - \mathcal{F}(y)(j)|^2 + \frac{\beta}{2} \sum_{j=1}^d |z(j) - h(j)|^2. \quad (\text{B.5})$$

It is straightforward that the solution to the problem is also diagonal, thus we have:

$$\mathcal{F}(Z^*) = \text{diag}(z^*(1), \dots, z^*(d)). \quad (\text{B.6})$$

Using the first-order condition and the diagonal structure of the problem, we get the following:

$$\frac{1}{\sigma^2 n} \sum_{i=1}^n [z^*(j) \mathcal{F}(x^i)(j) - \mathcal{F}(y)(j)] \overline{\mathcal{F}(x^i)(j)} + \beta(z^*(j) - k(j)) = 0 \quad (\text{B.7})$$

$$\Leftrightarrow z^*(j) \left( \frac{1}{n} \sum_{i=1}^n |\mathcal{F}(x^i)(j)|^2 + \sigma^2 \beta \right) = \mathcal{F}(y)(j) \frac{1}{n} \sum_{i=1}^n \overline{\mathcal{F}(x^i)(j)} + \sigma^2 \beta k(j) \quad (\text{B.8})$$

$$\Leftrightarrow z^*(j) = \frac{\mathcal{F}(y)(j) \frac{1}{n} \sum_{i=1}^n \overline{\mathcal{F}(x^i)(j)} + \sigma^2 \beta k(j)}{\frac{1}{n} \sum_{i=1}^n |\mathcal{F}(x^i)(j)|^2 + \sigma^2 \beta}. \quad (\text{B.9})$$

### C. M-step computations with DPS approximation

In this section, we develop the computation of the M-step in Fast EM for DPS. We start from Equation (32) of the main paper:

$$\hat{Q}(Z, Z_t) = \frac{-1}{2\sigma^2 n} \sum_{i=1}^n \|Z \hat{x}_0^i(t) - y\|_2^2. \quad (\text{C.1})$$

Our goal is to compute:

$$Z^* = \arg \min_{Z \in \mathcal{C}} -\hat{Q}(Z, Z_t) + (\beta/2) \|Z - H\|_2^2. \quad (\text{C.2})$$

We can notice that it is similar to Equation (B.4) with  $\hat{x}_0^i(t)$  instead of  $x^i$ . Thus we have that:

$$z^*(j) = \frac{\mathcal{F}(y)(j) \frac{1}{n} \sum_{i=1}^n \overline{\mathcal{F}(\hat{x}_0^i(t))(j)} + \sigma^2 \beta h(j)}{\frac{1}{n} \sum_{i=1}^n |\mathcal{F}(\hat{x}_0^i(t))(j)|^2 + \sigma^2 \beta}. \quad (\text{C.3})$$

### D. M-step computations with $\Pi$ GDM approximations

In this section, we develop the computation of the M-step in Fast EM for  $\Pi$ GDM. We start from Equation (33) of the main paper:

$$\hat{Q}(H, H_t) = \frac{-1}{2\sigma^2 n} \sum_{i=1}^n E_{x \sim \mathcal{N}(\hat{x}_0^i(t), r_t^2)} [\|Hx - y\|_2^2]. \quad (\text{D.1})$$

Our goal is to compute:

$$Z^* = \arg \min_{Z \in \mathcal{C}} -\hat{Q}(Z, Z_t) + (\beta/2) \|Z - H\|_2^2. \quad (\text{D.2})$$

Similarly to Section B, we work with diagonal operators so we have:

$$\mathcal{F}(H) = \text{diag}(h(1), \dots, h(d)) \quad (\text{D.3})$$

$$\mathcal{F}(Z) = \text{diag}(z(1), \dots, z(d)). \quad (\text{D.4})$$

and thus:

$$\mathcal{F}(Z^*) = \text{diag}(z^*(1), \dots, z^*(d)). \quad (\text{D.5})$$

We start by rewriting Equation D.1 in the Fourier domain using the fact that the Fourier transform preserves norms:

$$\mathcal{F}(Z^*) = \arg \min_z \frac{1}{2\sigma^2 n} \sum_{i=1}^n \sum_{j=1}^d E_{x \sim \mathcal{N}(\hat{x}_0^i(t), r_t^2)} [|z(j) \mathcal{F}(x)(j) - \mathcal{F}(y)(j)|^2] + (\beta/2) \sum_{j=1}^d |z(j) - h(j)|^2. \quad (\text{D.6})$$

We solve this problem using the first-order condition element by element since the problem is diagonal, the derivation inside the expectancy can be done using Fisher identity [1, Proposition D.4]:

$$\frac{1}{\sigma^2 n} \sum_{i=1}^n E_{x \sim \mathcal{N}(\hat{x}_0^i(t), r_t^2)} [z(j) \mathcal{F}(x)(j) - \mathcal{F}(y)(j) \overline{\mathcal{F}(x)(j)}] + \beta(z(j) - h(j)) = 0 \quad (\text{D.7})$$

$$\Leftrightarrow z(j) \left[ \frac{1}{n} \sum_{i=1}^n E_{x \sim \mathcal{N}(\hat{x}_0^i(t), r_t^2)} [|\mathcal{F}(x)(j)|^2] + \sigma^2 \beta \right] = \mathcal{F}(y)(j) \frac{1}{n} \sum_{i=1}^n E_{x \sim \mathcal{N}(\hat{x}_0^i(t), r_t^2)} [\overline{\mathcal{F}(x)(j)}] + \sigma^2 \beta h(j) \quad (\text{D.8})$$

Using the fact that the Fourier transform of a white Gaussian noise of variance  $\sigma^2$  is a white Gaussian noise of variance  $\sigma^2$ , the expected values yield:

$$\begin{aligned} E_{x \sim \mathcal{N}(\hat{x}_0, r_t^2)} [|\mathcal{F}(x)(j)|^2] &= r_t^2 + |\mathcal{F}(\hat{x}_0)(j)|^2 \\ E_{x \sim \mathcal{N}(\hat{x}_0, r_t^2)} [\overline{\mathcal{F}(x)(j)}] &= \overline{\mathcal{F}(\hat{x}_0)(j)} \end{aligned}$$

So we can conclude that:

$$z^*(j) = \frac{\mathcal{F}(y)(j) \frac{1}{n} \sum_{i=1}^n \overline{\mathcal{F}(\hat{x}_0^i(t))(j)} + \sigma^2 \beta h(j)}{\frac{1}{n} \sum_{i=1}^n |\mathcal{F}(\hat{x}_0^i(t))(j)|^2 + r_t^2 + \sigma^2 \beta} \quad (\text{D.9})$$

The main difference with DPS approximation is that we have an extra term in the denominator  $r_t^2$ .

## E. Additional results

See Figure E.1.

## References

- [1] Randal Douc, Eric Moulines, and David Stoffer. *Nonlinear Time Series*. Chapman and Hall/CRC, jan 2014. 3

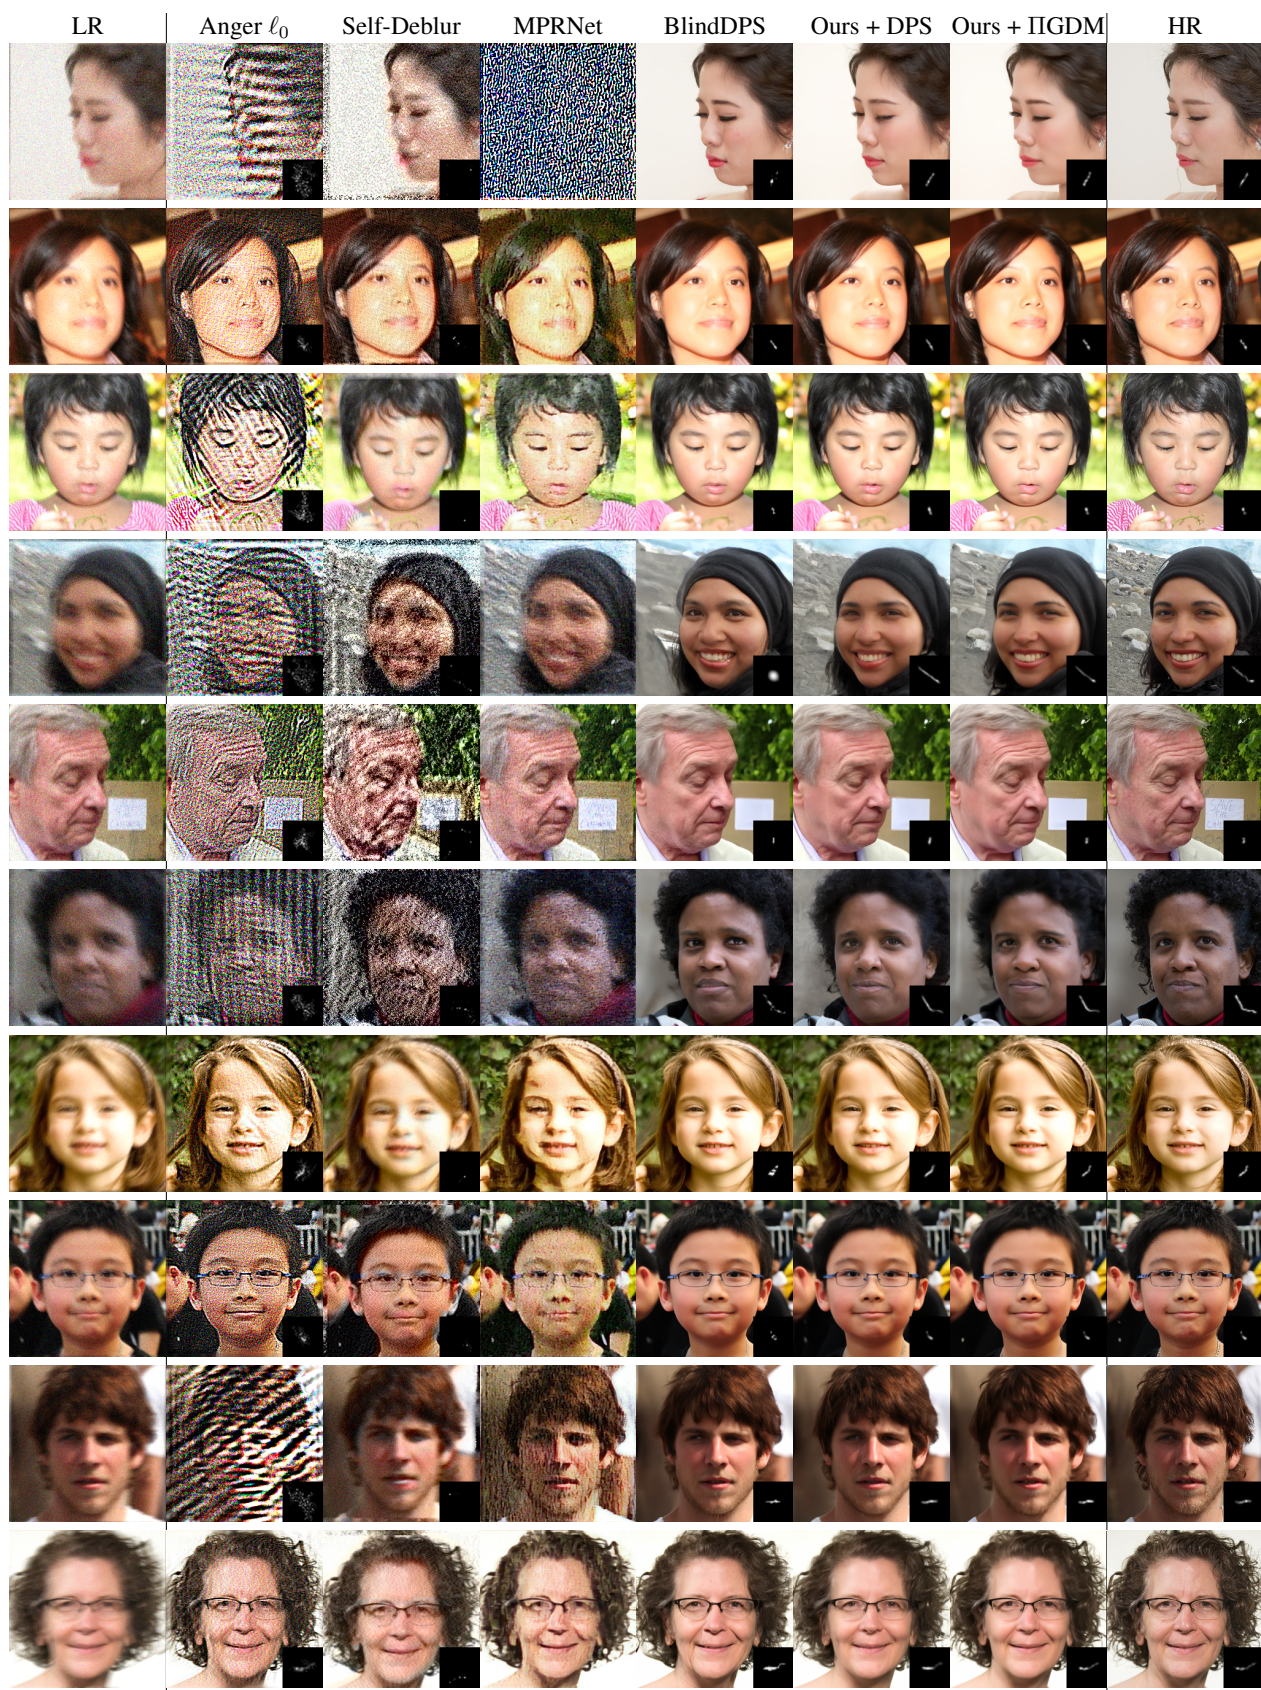

Figure E.1. Visual comparison of the different models on a degraded version of FFHQ 256x256 dataset. Ours correspond to Fast EM.
